# Supplementary material for: Ubiquitin-dependent folding of the Wnt signaling coreceptor LRP6
Source: eLife. 2016 Oct 18;5:e19083. doi: 10.7554/eLife.19083 (PMC5102578; doi:10.7554/eLife.19083)
Supplement: Figure 1—figure supplement 1—source data 1. — DOI: http://dx.doi.org/10.7554/eLife.19083.006 [file elife-19083-fig1-figsupp1-data1.xlsx]

## Sheet: Figure 1 S1
Figure 1 S1A_Pulse chase
time	RPE1 n=4	RPE1 sd		RPE1 delta usp19 n=3	RPE1 delta usp19 sd
0	100	0		100	0
0.5	83.8315	2.2156		74.0122	1.36068
1	68.3132	2.35433		50.0342	0.763035
2	57.3919	3.29736		39.6774	2.20124
3	41.2656	2.39503		23.3902	6.52736
4	33.8004	5.89057		17.9584	2.84629
5	26.3285	6.19932		17.2031	1.01523
6	19.0151	3.58838		9.95179	0.309119
time	HeLa n=6	HeLa sd		HeLa+OE USP19 n=3	HeLa+OE USP19 sd		HeLa+OE USP19CS n=3	HeLa+OE USP19CS sd
0	100	0		99.9991	0.00153566		100	0
0.5	82.821	4.21606		96.5126	3.4967		84.45	3.08
1	70.7878	2.38032		91.0492	6.53008		74.44	2.89
2	55.853	2.65379		84.9996	3.65119		56.66	3.01
3	48.498	4.38896		78.928	4.7109		49.56	3.65
4	40.1578	7.82325		71.217	4.49552		43.78	2.76
5	28.131	5.78121		65.5895	5.79668		31.65	3.65
6	23.8274	4.08062		59.893	4.18292		24.54	3.02
