# Supplementary material for: Ubiquitin-dependent folding of the Wnt signaling coreceptor LRP6
Source: eLife. 2016 Oct 18;5:e19083. doi: 10.7554/eLife.19083 (PMC5102578; doi:10.7554/eLife.19083)
Supplement: Figure 1—source data 1. — DOI: http://dx.doi.org/10.7554/eLife.19083.004 [file elife-19083-fig1-data1.xlsx]

## Sheet: Figure 1B
Figure 1B_ CHX chase
time	endogenous n=3	endogenous sd
0	100	0
0.5	88.7409	20.9164
1	90.6495	6.36601
2	90.1401	11.37
3	96.3227	9.98762
4	94.2946	2.26221
5	88.0977	9.29437
6	93.3303	1.20245

## Sheet: Figure 1D
Figure 1D,1E_pulse chase
time	endogenous 20 min n=6	endogenous 20 min sd		endogenous 16hrs n=4	endogenous 16hrs sd		endogenous 2hrs n=4	endogenous 2hrs sd
0	100	0		100	0		100	0
0.5	82.821	4.21606		97.7268	2.08776		91.67	2.56
1	70.7878	2.38032		96.0811	2.55193		84.65	3.67
2	55.853	2.65379		90.6169	3.99887		74.78	1.56
3	48.498	4.38896		82.7046	5.5999		65.46	5.45
4	40.1578	7.82325		74.0354	7.4784		53.78	5.67
5	28.131	5.78121		52.2793	5.29451		45.67	2.09
6	23.8274	4.08062		42.62	9.64906		39.99	4.78

## Sheet: Figure 1E
Figure 1E_pulse chase
time	endogenous 16hrs n=4	endogenous 16hrs sd
0	100	0
0.5	97.7268	2.08776
1	96.0811	2.55193
2	90.6169	3.99887
3	82.7046	5.5999
6	74.0354	7.4784
24	52.2793	5.29451
30	42.62	9.64906

## Sheet: Figure 1F
Figure 1G_pulse chase
time	endogenous n=6	endogenous sd		endogenous + MG132 n=4	endogenous + MG132 sd		endogenous + Baf n=3	endogenous + Baf sd
0	100	0		100	0		100	0
0.5	82.821	4.21606		99.3683	1.91099		88.7002	2.21434
1	70.7878	2.38032		95.6628	2.54851		82.6713	2.21404
2	55.853	2.65379		93.7806	1.5358		73.6109	4.80935
3	48.498	4.38896		87.6125	9.31113		67.7071	3.35543
4	40.1578	7.82325		79.9174	3.6873		58.8161	8.02919
5	28.131	5.78121		69.219	5.00213		51.65	1.41897
6	23.8274	4.08062		62.5936	6.2099		47.3836	5.87801

## Sheet: Figure 1H
Figure 1H_pulse chase
time	CC-SS n=6	CC-SS sd		CC-SS + MG132 n=4	CC-SS + MG132 sd		CC-SS + Baf n=3	CC-SS + Baf sd
0	100	0		100	0		100	0
0.5	86.5898	1.47412		99.6188	1.08197		90.6227	5.25004
1	67.8964	7.74429		96.4284	4.02723		81.8455	2.17516
2	57.5038	3.74278		93.8401	7.14117		62.8651	4.37331
3	50.4088	4.74905		87.9816	6.29877		51.9797	7.37692
4	37.5068	10.4014		82.812	5.83621		50.0974	4.01257
5	27.7144	5.9621		73.339	4.74907		32.693	5.07025
6	19.956	6.09897		64.6893	7.29802		25.7569	9.85592
