# Supplementary material for: Ubiquitin-dependent folding of the Wnt signaling coreceptor LRP6
Source: eLife. 2016 Oct 18;5:e19083. doi: 10.7554/eLife.19083 (PMC5102578; doi:10.7554/eLife.19083)
Supplement: Figure 2—source data 1. — DOI: http://dx.doi.org/10.7554/eLife.19083.008 [file elife-19083-fig2-data1.xlsx]

## Sheet: Figure 2A
Figure 2A_Pulse chase
time	WT n=6	WT sd		CC-SS n=3	CC-SS sd		K1403R n=6	K1403R sd
0	100	0		100	0		100	0
0.5	82.821	4.21606		80.56	5.67		73.2819	3.30818
1	70.7878	2.38032		68.88	3.33		53.8124	4.62167
2	55.853	2.65379		50.67	4.67		40.9587	4.33514
3	48.498	4.38896		48.45	4.78		31.9717	6.88827
4	40.1578	7.82325		37.68	6.45		21.2623	4.25349
5	28.131	5.78121		25.45	7.45		17.1234	2.48369
6	23.8274	4.08062		20.54	7.33		14.8063	2.57841

## Sheet: Figure 2B
Figure 2B_Pulse chase
time	WT n=7	WT sd		K1403R n=7	K1403R sd		WT + RNAi mesd n=3	WT + RNAi mesd sd				ttest	WT - KR	WT siRNA mesd - KR	WT - WT siRNA mesd
0	100	0		100.003	0.00564149		100	0				0	#DIV/0!	#DIV/0!	#DIV/0!
0.5	80.9626	2.96936		74.0654	3.35822		81.288	7.13779				0.5	0.0135396	0.110288	0.999784
1	72.6877	4.53612		54.2538	4.12238		65.8322	4.19435				1	0.00112146	0.0142677	0.170236
2	56.7399	2.52595		39.9582	4.37035		52.2645	6.26193				2	0.000751463	0.0510648	0.360874
3	49.2763	4.23605		31.7379	5.98829		40.3736	4.09711				3	0.0052066	0.150456	0.0837624
4	41.3052	7.92412		21.3389	3.68762		29.2251	7.68029				4	0.00429598	0.211128	0.184046
5	29.7173	7.2694		17.3674	2.21904		22.7262	1.8221				5	0.0168476	0.0130705	0.317497
6	25.6653	6.45545		14.7753	2.23404		14.8083	1.259				6	0.0204727	0.532022	0.0406574

## Sheet: Figure 2C
Figure 2C_Pulse chase
time	K1403R n=6	K1403R sd		K1403R + MG132 n=3	K1403R + MG132 sd		K1403R + Baf n=3	K1403R + Baf sd
0	100	0		100	0		100	0
0.5	73.2819	3.30818		99.2972	1.82474		83.0431	2.32642
1	53.8124	4.62167		96.7555	2.54141		62.4776	13.1877
2	40.9587	4.33514		81.731	7.17913		49.3891	6.67507
3	31.9717	6.88827		68.6767	12.6007		34.6722	4.00755
4	21.2623	4.25349		53.8923	5.80209		29.7624	9.66128
5	17.1234	2.48369		45.8626	6.23819		20.0563	4.24146
6	14.8063	2.57841		40.1253	5.96912		15.1326	2.25724

## Sheet: Figure 2E
Figure 2E_Pulse chase
time	WT n=4	sd		CC-SS n=3	CC-SS sd
0	100	0		100	0
0.5	91.67	2.56		82.33	6.8
1	84.65	3.67		67.78	4.67
2	74.78	1.56		55.78	3.56
3	65.46	5.45		40.99	6.61
4	53.78	5.67		32.67	2.89
5	45.67	2.09		30.67	4.79
6	39.99	4.78		28.68	9.8

## Sheet: Figure 2F
Figure 2F_Pulse chase
time	WT n=4	sd		K1403R n=3	K1403R sd		CC-SS n=3	CC-SS sd	CC-SS + K1403R n=3	CC-SS + K1403R sd
0	100	0		100	0		100	0	100	0
0.5	97.7268	2.08776		95.9159	5.57805		94.4661	3.36724	81.3631	2.68467
1	96.0811	2.55193		83.2837	3.11637		85.4685	5.91945	70.4919	11.6324
2	90.6169	3.99887		72.2503	7.77437		75.6856	7.04042	57.5828	6.70966
3	82.7046	5.5999		62.8603	10.3888		54.6503	0.813428	38.8472	10.8721
4	74.0354	7.4784		54.267	6.26511		39.3268	3.21794	30.3447	3.66848
5	52.2793	5.29451		29.9939	5.72171		21.8296	7.77204	16.592	4.98295
6	42.62	9.64906		21.9673	4.89125		16.2343	5.60672	12.4469	2.64027
