# Supplementary material for: Ubiquitin-dependent folding of the Wnt signaling coreceptor LRP6
Source: eLife. 2016 Oct 18;5:e19083. doi: 10.7554/eLife.19083 (PMC5102578; doi:10.7554/eLife.19083)
Supplement: Figure 3—figure supplement 1–source data 1. — DOI: http://dx.doi.org/10.7554/eLife.19083.012 [file elife-19083-fig3-figsupp1-data1.xlsx]

## Sheet: Figure 3 S1A
Figure 3 S1A_Q-PCR
	USP19	USP13	LRP6
RNAi Ctrl	100	100	100
RNAi USP19	20.6657	85.5211	86.3563
RNAi USP13	104.465	11.4621	120.354
sd	0	0	0
	3.52047	8.84662	10.0271
	9.48035	0.320234	7.74603

## Sheet: Figure 3 S1C
Figure 3 S1C_Western Blot
	average	sd
Ctrl	100	0
siUSP19	26.165	9.01872
OE-USP19	97.409	7.30408
ttest
ctrl-siRNA 19	0.000143607
Crtl- OE USP19	0.572171
OE USP19-SiRNA USP19	0.000442975
