# Supplementary material for: Ubiquitin-dependent folding of the Wnt signaling coreceptor LRP6
Source: eLife. 2016 Oct 18;5:e19083. doi: 10.7554/eLife.19083 (PMC5102578; doi:10.7554/eLife.19083)
Supplement: Figure 3—source data 1. — DOI: http://dx.doi.org/10.7554/eLife.19083.010 [file elife-19083-fig3-data1.xlsx]

## Sheet: Figure 3C
Figure 3C_Pulse chase
time	WT n=6	WT sd		WT + O.E. USP19 n=3	WT + O.E. USP19 sd		WT + siRNA usp19 n=3	WT + siRNA usp19 sd	WT + O.E. USP19C-S n=3	WT + O.E. USP19C-S sd	WT + siRNA Ctrl n=3	WT + siRNA Ctrl sd
0	100	0		99.9991	0.00153566		100	0	100	0	100	0
0.5	82.821	4.21606		96.5126	3.4967		81.22	3.55	86.1159	3.72299	84.283	8.97094
1	70.7878	2.38032		91.0492	6.53008		53.78	5.7	76.8882	1.8578	71.1397	6.1118
2	55.853	2.65379		84.9996	3.65119		42.89	3.89	55.572	4.10981	50.8343	1.68169
3	48.498	4.38896		78.928	4.7109		28.88	6.54	45.7127	2.4152	41.7547	6.47846
4	40.1578	7.82325		71.217	4.49552		18.67	2.45	39	0.265263	34.9803	5.89582
5	28.131	5.78121		65.5895	5.79668		16.78	3.89	28.183	2.09235	22.9042	3.66982
6	23.8274	4.08062		59.893	4.18292		14.44	4.67	20.659	3.08042	18.1642	1.79069

## Sheet: Figure 3D
Figure 3D_Pulse chase
time	CC-SS n=3	CC-SS sd		CC-SS + siRNA usp19	CC-SS + siRNA usp19 sd		CC-SS + O.E. USP19 n=3	CC-SS + O.E. USP19 sd
0	100	0		100	0		100	0
0.5	80.56	5.67		78.67	3.78		90.78	4.78
1	68.88	3.33		45.78	5.56		85.89	6.78
2	50.67	4.67		35.67	6.09		70.78	4.56
3	48.45	4.78		20.78	6.08		65.55	3.04
4	37.68	6.45		15.78	7.23		60.78	4.9
5	25.45	7.45		13.77	4.9		55.9	6.08
6	20.54	7.33		10.67	3.11		50.68	3.33

## Sheet: Figure 3E
Figure 3E_Pulse chase
time	K1403R n=6	K1403R sd		K1403R + O.E. USP19 n=3	K1403R + O.E. USP19 sd		K1403R + siRNA usp19	K1403R + siRNA usp19 sd
0	100	0		100	0		100	0
0.5	73.2819	3.30818		71.6931	3.67685		70.78	2.6
1	53.8124	4.62167		50.1536	4.54196		49.78	4.89
2	40.9587	4.33514		34.446	0.282931		40.78	5.68
3	31.9717	6.88827		33.9447	4.56596		28.78	6.78
4	21.2623	4.25349		22.9064	6.87398		22.45	4.05
5	17.1234	2.48369		21.4169	1.54924		16.56	5.11
6	14.8063	2.57841		15.6116	3.06787		13.78	5.99

## Sheet: Figure 3F
Figure 3F_Pulse chase
time	CC-SS + K1403R n=3	CC-SS + K1403R sd		CC-SS + K1403R + O.E. USP19 n=3	CC-SS + K1403R + O.E. USP19 sd		CC-SS + K1403R + siRNA n=3	CC-SS + K1403R + siRNA sd
0	100	0		100	0		100	0
0.5	81.22	6.89		80.89	4.78		83.9	5.78
1	60.67	4.03		59.56	5.66		64.9	6.56
2	45.67	2.89		44.77	7.98		48.9	7.56
3	40.78	5.9		40.99	8.54		43.89	3.45
4	32.67	6.56		30.67	8.44		35.44	6.78
5	19.89	2.89		18.05	3.99		22.78	3.08
6	15.44	4.66		14.88	6.88		16.89	3.88
