# Supplementary material for: Ubiquitin-dependent folding of the Wnt signaling coreceptor LRP6
Source: eLife. 2016 Oct 18;5:e19083. doi: 10.7554/eLife.19083 (PMC5102578; doi:10.7554/eLife.19083)
Supplement: Figure 4—figure supplement 1–source data 1. — DOI: http://dx.doi.org/10.7554/eLife.19083.016 [file elife-19083-fig4-figsupp1-data1.xlsx]

## Sheet: Figure 4 S1
Figure 4 S1_Surface expression
					average	sd			ttest
Ctrl	100	100	100		100	0		Ctrl-siUSP19	0.000323447
siUSP19	25.4715	26.5305	39.0893		30.3638	7.57511
siUSP13	92.2819	94.3785	48.3309		78.3304	26.0015
