# Supplementary material for: Ubiquitin-dependent folding of the Wnt signaling coreceptor LRP6
Source: eLife. 2016 Oct 18;5:e19083. doi: 10.7554/eLife.19083 (PMC5102578; doi:10.7554/eLife.19083)
Supplement: Figure 4—source data 1. — DOI: http://dx.doi.org/10.7554/eLife.19083.014 [file elife-19083-fig4-data1.xlsx]

## Sheet: Figure 4
Figure 4A_Wnt signaling
	-	Mesd	Myc-LRP6	Myc-LRP6 + Mesd	Myc-LRP6 + Mesd + USP19			ttest	Myc-LRP6-Myc-LRP6 + Mesd	0.000104471
average	0.533479	0.716559	31.7982	100	151.7				Myc-LRP6 + Mesd - Myc-LRP6 + Mesd + USP19	0.00638303
sd	0.401166	0.357636	4.94331	2.73888e-08	22.1037

## Sheet: Figure 4B
Figure 4B_Wnt signaling
	Ctrl	USP19	USP13
average	100	13.1287	70.6411
sd	0	9.11076	17.8682
